# Supplementary material for: Small Dense LDL Level and LDL/HDL Distribution in Acute Coronary Syndrome Patients
Source: MDPI journal article supplement (doi:10.3390/biomedicines11041198), 2023-04-18
Supplement: s1 [file s1]

# Small dense LDL as a valuable marker for cardiovascular disease

Alyann Otrante<sup>1</sup>, Abdelghani Bounafaa<sup>1,2</sup>, Hicham Berrougui<sup>1,3</sup>, Abdel-Khalid Essamadi<sup>2</sup>, Michel Nguyen<sup>4</sup>, Tamàs Fülöp<sup>1</sup> and Abdelouhed Khalil<sup>1,\*</sup>

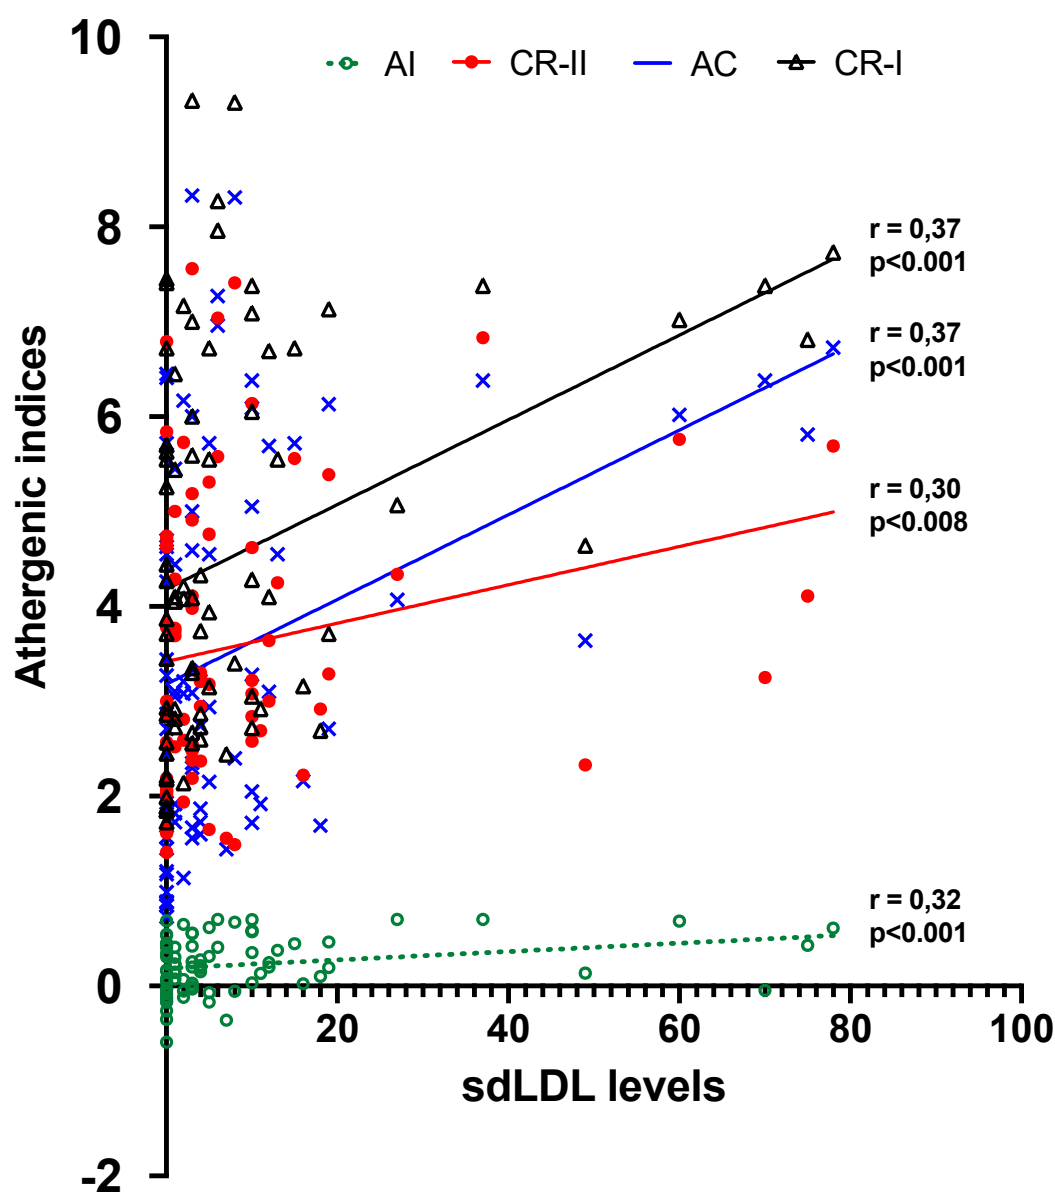

**Figure S1: Spearman correlation analysis between the sdLDL levels and several atherogenic indices.**  
 AIP: atherogenic index of plasma, AC: atherogenic coefficient, CRI-I: Castelli's Risk Index and CR-II: Castelli's Risk Index
